# Supplementary material for: A novel Ir-hexaaluminate catalyst for N2O as a propellant
Source: Royal Society of Chemistry journal article supplement (doi:10.1039/b702502e), 2007-01-01
Supplement: b702502e.pdf [file b702502e.pdf]

## A novel Ir-hexaaluminate catalyst for N<sub>2</sub>O as a propellant

Shaomin Zhu, Xiaodong Wang, Aiqin Wang, Yu Cong and Tao Zhang\*

State Key Laboratory of Catalysis, Dalian Institute of Chemical Physics,  
Chinese Academy of Sciences, Dalian, China

E-mail: [Taozhang@dicp.ac.cn](mailto:Taozhang@dicp.ac.cn)

Fig. S1 shows X-ray diffraction patterns of (a) BIFA (x=0.2) catalysts and (b) Ir/Al<sub>2</sub>O<sub>3</sub> catalysts calcined at different temperatures.

(□ IrO<sub>2</sub>, □ BaAl<sub>12</sub>O<sub>19</sub>, ○ γ-Al<sub>2</sub>O<sub>3</sub>, ● α-Al<sub>2</sub>O<sub>3</sub>, ↓ BaAl<sub>2</sub>O<sub>4</sub>)

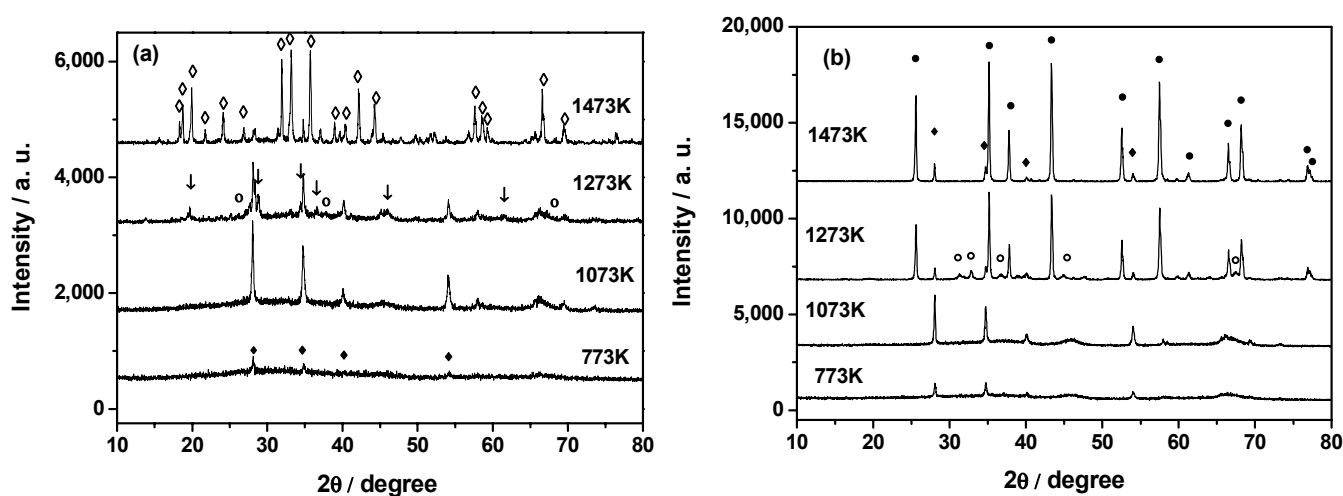

Fig. S1

Fig. S2 shows H<sub>2</sub>-TPR profiles for BIFA (x=0.2) and Ir/Al<sub>2</sub>O<sub>3</sub> catalysts calcined at different temperatures.

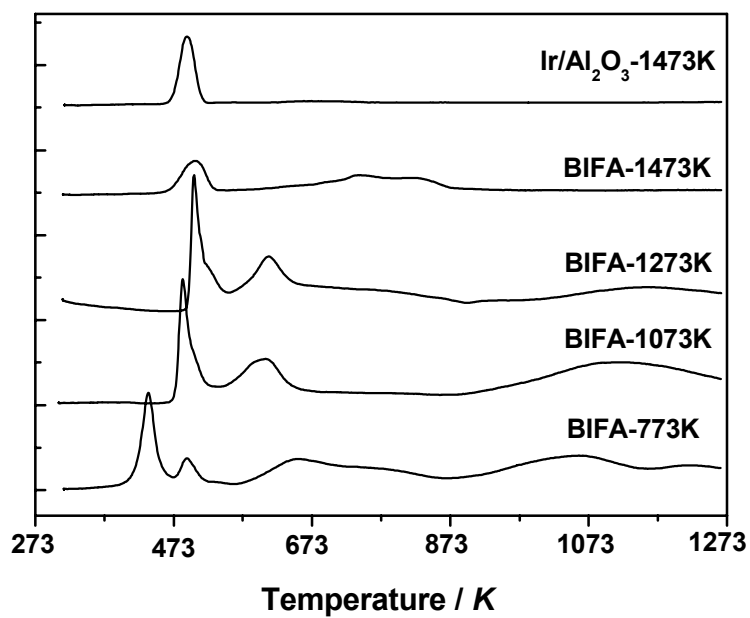

Fig. S2
